# Supplementary material
Source: Research Square preprint supplement (doi:10.21203/rs.3.rs-9491472/v1)
Supplement: Supplementary file 1 [file b001519f323d91c31912f2b6.docx]

**Graphical abstract:**


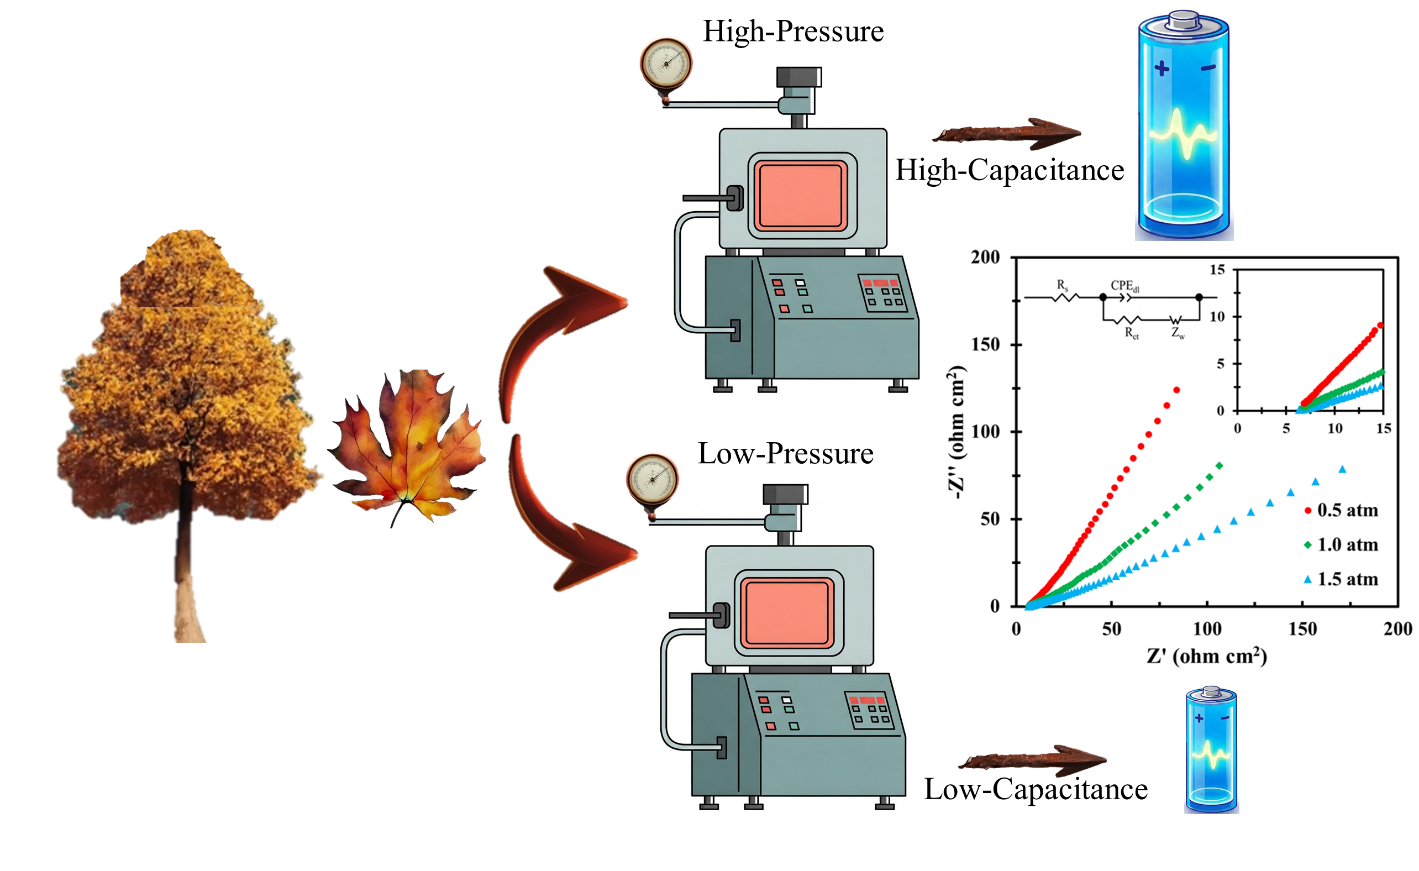


**Graphical abstract:** Reducing the pressure of the biomass pyrolysis process increases the porosity and capacitance of the produced biochar.
